# Supplementary material for: A Novel Role for α-Tocopherol Transfer Protein (α-TTP) in Protecting against Chloroquine Toxicity
Source: PubMed Central journal article supplement — J Biol Chem. 2011 Dec 6;287(4):2926–34. doi: 10.1074/jbc.M111.321281 (PMC3268449; doi:10.1074/jbc.m111.321281), 2011-12-06

## Supplemental data

A novel role for  $\alpha$ -tocopherol transfer protein ( $\alpha$ -TTP) in protecting against chloroquine toxicity

**Mototada Shichiri<sup>1,2,3</sup>, Nozomu Kono<sup>1</sup>, Yuta Shimanaka<sup>1</sup>, Masaki Tanito<sup>4</sup>, Daisy E. Rotzoll<sup>5</sup>,  
Yasukazu Yoshida<sup>2</sup>, Yoshihisa Hagihara<sup>2</sup>, Hiroshi Tamai<sup>3</sup>, and Hiroyuki Arai<sup>1</sup>**

<sup>1</sup>From Department of Health Chemistry, Graduate School of Pharmaceutical Sciences, The University of Tokyo, 7-3-1 Hongo, Bunkyo-ku, Tokyo 113-0033, Japan

<sup>2</sup>Health Research Institute, National Institute of Advanced Industrial Science and Technology (AIST), Ikeda, Osaka 563-8577, Japan

<sup>3</sup>Department of Pediatrics, Osaka Medical College, 2-7 Daigakumachi, Takatsuki, Osaka 569-8686, Japan

<sup>4</sup>Department of Ophthalmology, Shimane University Faculty of Medicine, Shimane 693-8501, Japan

<sup>5</sup>Division of Neonatology, Department of Pediatrics, University of Heidelberg, INF 150, D-69120 Heidelberg, Germany

Running title:  *$\alpha$ -TTP function in chloroquine toxicity*

To whom correspondence should be addressed: Hiroyuki Arai, Department of Health Chemistry, Graduate School of Pharmaceutical Sciences, The University of Tokyo, 7-3-1 Hongo, Bunkyo-ku, Tokyo 113-0033, Japan, Tel: +81-3-5841-4720; Fax: +81-3-3818-3173; E-mail: harai@mol.f.u-tokyo.ac.jp

## Supplemental figure legends

Supplemental Fig. S1. Bafilomycin A1 inhibits chloroquine-induced cell death.

Viabilities of McARH7777 and McA-TTP cells were measured 36 h following treatment with bafilomycin A1 with or without 50  $\mu$ M chloroquine. Cells were pre-treated with bafilomycin A1 for 45 min before addition of 50  $\mu$ M chloroquine to each cell. Bafilomycin A1 dose-dependently inhibited chloroquine toxicity was observed in McARH7777 cells. Data represent means  $\pm$  SD. \* $p < 0.0025$ , \*\* $p < 0.0001$ , compared with McA-TTP cells which were treated with the same dose of bafilomycin A1 (unpaired t-test).

Supplemental Fig. S2. CQ can not inhibit  $\alpha$ -TTP-mediated  $\alpha$ -tocopherol transfer.

We used a lipid-protein co-sedimentation assay to examine the inhibitory action of CQ on the  $\alpha$ -TTP-mediated  $\alpha$ -tocopherol transfer. The liposomes were made from PE/PC=80  $\mu$ g/20  $\mu$ g containing [<sup>3</sup>H]  $\alpha$ -tocopherol ( $5 \times 10^4$  dpm, 1 pmol) and cold  $\alpha$ -tocopherol (30 pmol). These liposomes were mixed with 10  $\mu$ g of  $\alpha$ -TTP (330 pmol) which were pre-incubated with 0, 10, 100, 1000  $\mu$ M (0, 1, 10, 100 nmol) of CQ for 10 min. The liposome-protein mixtures were incubated for 15 min at room temperature and ultracentrifuged at  $100,000 \times g$  for 20 min. The [<sup>3</sup>H]  $\alpha$ -tocopherol ( $\alpha$ -Toc) in the supernatant and the precipitate were measured by a liquid scintillation counter. We found no significant inhibitory effect even in the presence of an excess amount of CQ.

**Fig. S1**

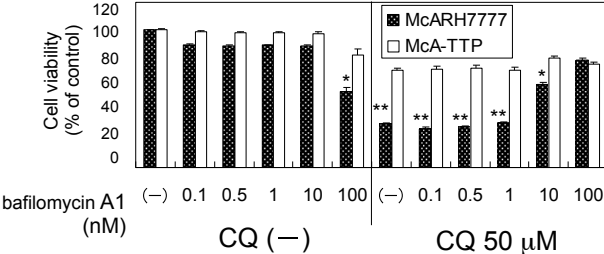

**Fig. S2**

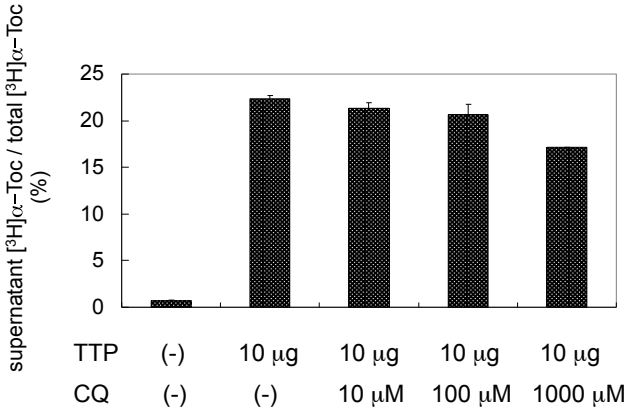

Supplement: supp_M111.321281_jbc.M111.321281-1.pdf [file supp_M111.321281_jbc.M111.321281-1.pdf]
